# Supplementary material
Source: PubMed Central journal article supplement (PMC3448878)
Supplement: NIHMS392361-supplement-1.pdf [file NIHMS392361-supplement-1.pdf]

*Supporting Information for:*

**Identification of a Selective ROR $\gamma$  Ligand that Suppresses T<sub>H</sub>17 cells  
and Stimulates T Regulatory Cells**

Authors: Laura A. Solt, Naresh Kumar, Yuanjun He, Theodore M. Kamenecka, Patrick  
R. Griffin, and Thomas P. Burris

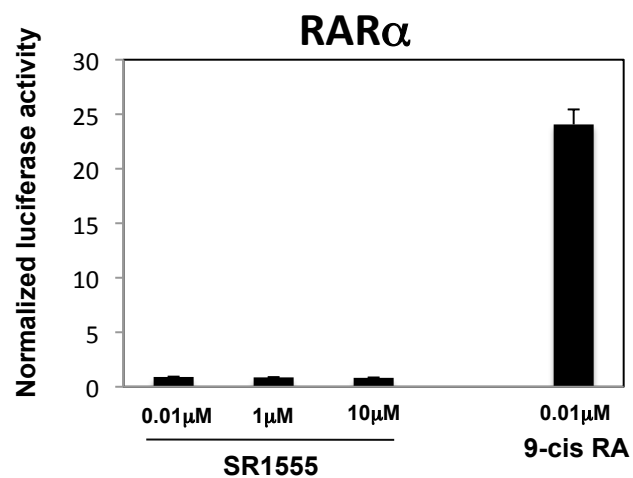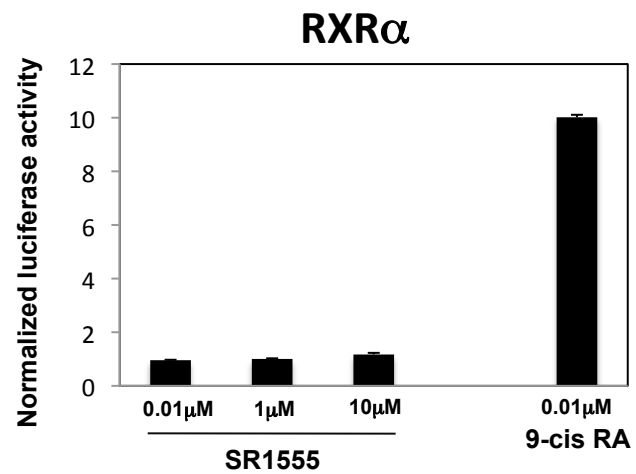

**Supplementary Figure 1.** SR1555 does not activate RAR $\alpha$  or RXR $\alpha$ . GAL4-RAR $\alpha$  and RXR $\alpha$  co-transfection assays in HEK293 cells illustrating the specificity SR1555 vs. 9-cis retinoic acid.

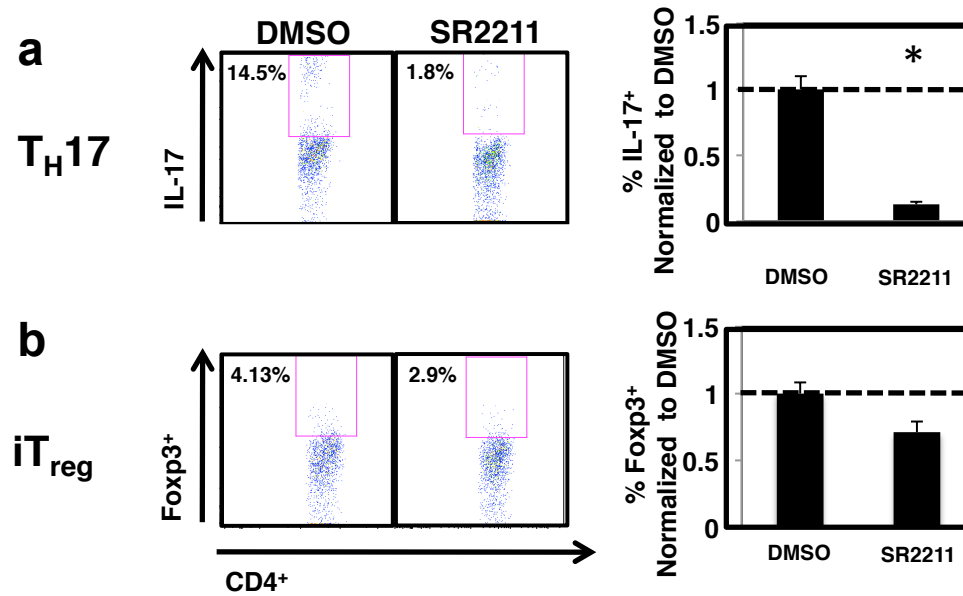

**Supplementary Figure 2.** SR2211 inhibits IL-17 expression. a) Intracellular cytokine staining on splenocytes treated with DMSO or SR2211 (2 $\mu$ M) for the duration of the experiment. Cells were gated on CD4<sup>+</sup> T cells. Graph on the right summarizes IL-17 expression normalized to DMSO. ( $n=4$ ,  $*p<0.05$ ). b) Intracellular cytokine staining on splenocytes differentiated under iTreg conditions for 5 days treated with vehicle control (DMSO) or SR2211 (2 $\mu$ M) for the duration of the experiment. Cells were gated on CD4<sup>+</sup> T cells. Graphs to the right of the FACS plots summarize the Foxp3<sup>+</sup> expression normalized to DMSO. ( $n=4$ ).
